# Supplementary material for: Remapping of the belted phenotype in cattle on BTA3 identifies a multiplication event as the candidate causal mutation
Source: PubMed Central journal article supplement (PMC6035435; doi:10.1186/s12711-018-0407-9), 2018-07-06
Supplement: 12711_2018_407_MOESM2_ESM.pdf [file 12711_2018_407_MOESM2_ESM.pdf]

Additional\_File2\_BCAalignment.txt

```
#=====
#
# Aligned_sequences: 2
# 1: bosTau6_CR_rev
# 2: CH240-104M22
# Matrix: EDNAFULL
# Gap_penalty: 10.0
# Extend_penalty: 0.5
#
# Length: 6001
# Identity: 5996/6001 (99.9%)
# Similarity: 5996/6001 (99.9%)
# Gaps: 0/6001 (0.0%)
# Score: 29960.0
#
#
#=====
```

```

bosTau6_CR_re      1 CCTAGATAGCATATTCAAAAGCAGAGATATTACTTTGCCAACAAAGGTCC      50
CH240-104M22    46656 CCTAGATAGCATATTCAAAAGCAGAGATATTACTTTGCCAACAAAGGTCC    46705
bosTau6_CR_re     51 ATCTAGTCAAGGCTGGTTTTTCCAGTGGTCATGTATGGATGTGAGAGTTG     100
CH240-104M22    46706 ATCTAGTCAAGGCTGGTTTTTCCAGTGGTCATGTATGGATGTGAGAGTTG    46755
bosTau6_CR_re    101 GACTGTGAAGAAAAC TGAGCACCGAAGAATTAATGCTTTTGAAGTGTGGT     150
CH240-104M22    46756 GACTGTGAAGAAAAC TGAGCACCGAAGAATTAATGCTTTTGAAGTGTGGT    46805
bosTau6_CR_re    151 GTTGGAGAAGACTCTTGAGACTCCCTTGGACTGCAAGGAGATGCAACCAG     200
CH240-104M22    46806 GTTGGAGAAGACTCTTGAGACTCCCTTGGACTGCAAGGAGATGCAACCAG    46855
bosTau6_CR_re    201 TCCATTCTAAAGGAGATCAGCCCTGGGATTTCTTTGGAAGGAATAATGCT     250
CH240-104M22    46856 TCCATTCTAAAGGAGATCAGCCCTGGGATTTCTTTGGAAGGAATAATGCT    46905
bosTau6_CR_re    251 AAAGCTGAAACTCCAGTACTTTGGCCACCTGATGTGAAGAGTTGACTCAT     300
CH240-104M22    46906 AAAGCTGAAACTCCAGTACTTTGGCCACCTGATGTGAAGAGTTGACTCAT    46955
bosTau6_CR_re    301 TGGAAAAGACTCTGATGCTGGGAGGGATTGGGGCAGGAGGAGAAGGGGA     350
CH240-104M22    46956 TGGAAAAGACTCTGATGCTGGGAGGGATTGGGGCAGGAGGAGAAGGGGA    47005
bosTau6_CR_re    351 CGACAGAGGATGAGATGGCTGGATGGCATCACCGACTCGATGGACGTGAG     400
CH240-104M22    47006 CGACAGAGGATGAGATGGCTGGATGGCATCACCGACTCGATGGACGTGAG    47055
bosTau6_CR_re    401 TCTGAGTGAAGTCCGGGAGTTGGTGTGATGGACAGGGAGGCCTGGTGTGTTG     450
CH240-104M22    47056 TCTGAGTGAAGTCCGGGAGTTGGTGTGATGGACAGGGAGGCCTGGTGTGTTG    47105
bosTau6_CR_re    451 CGATTCACGGGGTCGAAAGAGTCGGACACGACTGAGCGACTGAACTGAA     500
CH240-104M22    47106 CGATTCACGGGGTCGAAAGAGTCGGACACGACTGAGCGACTGAACTGAA    47155
bosTau6_CR_re    501 CTGATGCTGACTACCTCTTTTTATGCTCTAACAACATAGGGTAATCCGT     550
CH240-104M22    47156 CTGATGCTGACTACCTCTTTTTATGCTCTAACAACATAGGGTAATCCGT    47205
bosTau6_CR_re    551 GTGGCCCACCTCTCCTCACACTTGGGATTTAGTTTCTCTGTGGCCTTTTTG     600
CH240-104M22    47206 GTGGCCCACCTCTCCTCACACTTGGGATTTAGTTTCTCTGTGGCCTTTTTG    47255
bosTau6_CR_re    601 AATTCAATTCAGTGGACTAAAGGAACATGATGATCCTGTAGATTATCC     650

```

Additional\_File2\_BAAlignment.txt

|               |       |                                                       |       |
|---------------|-------|-------------------------------------------------------|-------|
| CH240-104M22  | 47256 | AATTC AATTC ACTAGGGACTAAAGGAACATGATGATCCTGTAGATTATCC  | 47305 |
| bosTau6_CR_re | 651   | AACTTCTCACTGTCAGAGTAAGAGTAGTGGTCCCCGGCAACTTTTTATAA    | 700   |
| CH240-104M22  | 47306 | AACTTCTCACTGTCAGAGTAAGAGTAGTGGTCCCCGGCAACTTTTTATAA    | 47355 |
| bosTau6_CR_re | 701   | CCCAAGTAGAAACAGTTCGTGCAAGCTCAGTTGCCCCATCGCTCAGTCGT    | 750   |
| CH240-104M22  | 47356 | CCCAAGTAGAAACAGTTCGTGCAAGCTCAGTTGCCCCATCGCTCAGTCGT    | 47405 |
| bosTau6_CR_re | 751   | GTCTGATTCTTTGCAACCTACGGACTGTAGCCC GG CAGACTCCTCTCTCC  | 800   |
| CH240-104M22  | 47406 | GTCTGATTCTTTGCAACCTACGGACTGTAGCCC GG CAGACTCCTCTCTCC  | 47455 |
| bosTau6_CR_re | 801   | ATGGAAC TTTCCAGACAAGAATACTGAAGTGAGTTGCCACGTCCTATTCC   | 850   |
| CH240-104M22  | 47456 | ATGGAAC TTTCCAGACAAGAATACTGAAGTGAGTTGCCATGTCCTATTCC   | 47505 |
| bosTau6_CR_re | 851   | AGGGGATCTTCCTGATCCAGGAATCAAAC T CACAAC TCTTGGGTCTCCTG | 900   |
| CH240-104M22  | 47506 | AGGGGATCTTCCTGATCCAGGAATCAAAC T CACAAC TCTTGGGTCTCCTG | 47555 |
| bosTau6_CR_re | 901   | AGTCTCCAGCACTGGCCGGCAGATTCTTTACCCCTGCGTCTCCTGGGAAG    | 950   |
| CH240-104M22  | 47556 | AGTCTCCAGCACTGGCCGGCAGATTCTTTACCCCTGCGTCTCCTGGGAAG    | 47605 |
| bosTau6_CR_re | 951   | CCGCAGATGGAAGCAGATTCCACTGAAAGCTCTCCCAGCCATGTCTCAC     | 1000  |
| CH240-104M22  | 47606 | CCGCAGATGGAAGCAGATTCCACTGAAAGCTCTCCCAGCCATGTCTCAC     | 47655 |
| bosTau6_CR_re | 1001  | CGCCACTGTCCCCCTGCTGGTCACTGTTATAGGCATACATGAGACATGCC    | 1050  |
| CH240-104M22  | 47656 | CGCCACTGTCCCCCTGCTGGTCACTGTTATAGGCATACATGAGACATGCC    | 47705 |
| bosTau6_CR_re | 1051  | GTGCGGTGGCCTCACCCATTCATGGCTGTTTGTGGTCAACAGAAGCATCT    | 1100  |
| CH240-104M22  | 47706 | GTGCGGTGGCCTCACCCATTCATGGCTGTTTGTGGTCAACAGAAGCATCT    | 47755 |
| bosTau6_CR_re | 1101  | AGCTTGCCTTTTACATCACTTGTTGCTGCTGCTGCTGCTGCTAAGTCACT    | 1150  |
| CH240-104M22  | 47756 | AGCTTGCCTTTTACATCACTTGTTGCTGCTGCTGCTGCTGCTAAGTCACT    | 47805 |
| bosTau6_CR_re | 1151  | TCAGTCGTGTCCGACTCTGTGTAACCCAGAGACGGCAGCCCACCAGGCT     | 1200  |
| CH240-104M22  | 47806 | TCAGTCGTGTCCGACTCTGTGTAACCCAGAGACGGCAGCCCACCAGGCT     | 47855 |
| bosTau6_CR_re | 1201  | TCCCTGTCCCTGGGATTCTCCAGGCAAGA A CACTGGAGTGGGTTGCCATT  | 1250  |
| CH240-104M22  | 47856 | TCCCTGTCCCTGGGATTCTCCAGGCAAGA A CACTGGAGTGGGTTGCCATT  | 47905 |
| bosTau6_CR_re | 1251  | TCCTTCTCCAATGCATGAAAGTAAAAGTAAAAGTGAAGTCACTCAGTTG     | 1300  |
| CH240-104M22  | 47906 | TCCTTCTCCAATGCATGAAAGTAAAAGTAAAAGTGAAGTCACTCAGTTG     | 47955 |
| bosTau6_CR_re | 1301  | TGTCCAAC TCTTAGCGACCCCATGGACTGCAGCCTACCAGGCTCCTCCAT   | 1350  |
| CH240-104M22  | 47956 | TGTCCAAC TCTTAGCGACCCCATGGACTGCAGCCTACCAGGCTCCTCCAT   | 48005 |
| bosTau6_CR_re | 1351  | CCATGGGATTTTCTAGGCAACAGTACTGGAGTGGGGT GCCATTGCCTTCT   | 1400  |
| CH240-104M22  | 48006 | CCATGGGATTTTCTAGGCAACAGTACTGGAGTGGGGT GCCATTGCCTTCT   | 48055 |
| bosTau6_CR_re | 1401  | CCACATCACTTGTTACCAGAGCTTATATTCAACTTGCATCTCATGAGTCT    | 1450  |
| CH240-104M22  | 48056 | CCACATCACTTGTTACCAGAGCTTATATTCAACTTGCATCTCATGAGTCT    | 48105 |
| bosTau6_CR_re | 1451  | CTTTGTCAACGTGATTTTGTAGTCTTCCAAGGCTTAGGGGAAACTAATT     | 1500  |

Additional\_File2\_BAAlignment.txt

|               |       |                                                     |       |
|---------------|-------|-----------------------------------------------------|-------|
| CH240-104M22  | 48106 | CTTTGTCAACGTGATTTTGTAGTCTTCCAAGGCTTAGGGGAACTAATT    | 48155 |
| bosTau6_CR_re | 1501  | TGTAAATTTTCAAAGGTGGGAGCTCTCCAAGTGAGAGTTCTTTCCCGTGT  | 1550  |
| CH240-104M22  | 48156 | TGTAAATTTTCAAAGGTGGGAGCTCTCCAAGTGAGAGTTCTTTCCCGTGT  | 48205 |
| bosTau6_CR_re | 1551  | GAAATCTAGTATCAGGAAGTGCCTGTATCCACGCACCCCTCGTCCTATC   | 1600  |
| CH240-104M22  | 48206 | GAAATCTAGTATCAGGAAGTGCCTGTATCCACGCACCCCTCGTCCTATC   | 48255 |
| bosTau6_CR_re | 1601  | CAGGACCCAGATGGATGAGTCGTGTCTCTCTCTGCCTGTGTCTGCCCATC  | 1650  |
| CH240-104M22  | 48256 | CAGGACCCAGATGGATGAGTCGTGTCTCTCTCTGCCTGTGTCTGCCCATC  | 48305 |
| bosTau6_CR_re | 1651  | TCTGACTCAGATGGGCACATCCAGAGAGGTCCCTAGTCTCTGCCTTCCCC  | 1700  |
| CH240-104M22  | 48306 | TCTGACTCAGATGGGCACATCCAGAGAGGTCCCTAGTCTCTGCCTTCCCC  | 48355 |
| bosTau6_CR_re | 1701  | CTTCCACCCAGAACACTCATCCGGGGCTACCACCTCGCAGGAGGTGTGAA  | 1750  |
| CH240-104M22  | 48356 | CTTCCACCCAGAACACTCATCCGGGGCTACCACCTCGCAGGAGGTGTGAA  | 48405 |
| bosTau6_CR_re | 1751  | TCACGGATCCCAGTGCGACAATTAGAACACTCCCGTTTGCTCTCAGAAGT  | 1800  |
| CH240-104M22  | 48406 | TCACGGATCCCAGTGCGACAATTAGAACACTCCCGTTTGCTCTCAGAAGT  | 48455 |
| bosTau6_CR_re | 1801  | GTCACCTTTTTAGACAATATATTAAGCAGGCACCCTCGTCCTCAGGGATCA | 1850  |
| CH240-104M22  | 48456 | GTCACCTTTTTAGACAATATATTAAGCAGGCACCCTCGTCCTCAGGGATCA | 48505 |
| bosTau6_CR_re | 1851  | GGTGGCCCCACTCAGCCGGAACGCCCTGGTGCTCAGTGCGTCTTGCCCTT  | 1900  |
| CH240-104M22  | 48506 | GGTGGCCCCACTCAGCCGGAACGCCCTGGTGCTCAGTGCGTCTTGCCCTT  | 48555 |
| bosTau6_CR_re | 1901  | GAACCTGCTCCTGGGTTCTCCCAACCCCCAGCCTGTTGCTTGGTCCCATTG | 1950  |
| CH240-104M22  | 48556 | GAACCTGCTCCTGGGTTCTCCCAACCCCCAGCCTGTTGCTTGGTCCCATTG | 48605 |
| bosTau6_CR_re | 1951  | TCACCCTGAGTGATGACCGCTCAGGGCAGACCCTCACTCTTCTTGCCAT   | 2000  |
| CH240-104M22  | 48606 | TCACCCTGAGTGATGACCGCTCAGGGCAGACCCTCACTCTTCTTGCCAT   | 48655 |
| bosTau6_CR_re | 2001  | GACACTTCTTTTGGAGGCAGCCTTGGGGAAGGGTCCTATTTGTTCCCCTC  | 2050  |
| CH240-104M22  | 48656 | GACACTTCTTTTGGAGGCAGCCTTGGGGAAGGGTCCTATTTGTTCCCCTC  | 48705 |
| bosTau6_CR_re | 2051  | TGCCTCGAGGTCCCTTCCCAGGGGCTGACTCAAGTGACCCAGGCTTCTCC  | 2100  |
| CH240-104M22  | 48706 | TGCCTCGAGGTCCCTTCCCAGGGGCTGACTCAAGTGACCCAGGCTTCTCC  | 48755 |
| bosTau6_CR_re | 2101  | TGCACAGGGACAGGGTTGGCTCAGCACTGCCATGATGAATCCAGAGCCCA  | 2150  |
| CH240-104M22  | 48756 | TGCACAGGGACAGGGTTGGCTCAGCACTGCCATGATGAATCCAGAGCCCA  | 48805 |
| bosTau6_CR_re | 2151  | GAGAGGCAGAACTCTCACGTGCAGAGTCTGCATTGAGTGAGACAGCTGGC  | 2200  |
| CH240-104M22  | 48806 | GAGAGGCAGAACTCTCACGTGCAGAGTCTGCATTGAGTGAGACAGCTGGC  | 48855 |
| bosTau6_CR_re | 2201  | CCACACATTTGTGGATTTATCCTGAAATCCAAGCTTGTCCGATGCTGAGG  | 2250  |
| CH240-104M22  | 48856 | CCACACATTTGTGGATTTATCCTGAAATCCAAGCTTGTCCGATGCTGAGG  | 48905 |
| bosTau6_CR_re | 2251  | GCGGCTCTGAGCTGGGGATCTGTACAGACCCAGGAGCCATTAAGCATCTT  | 2300  |
| CH240-104M22  | 48906 | GCGGCTCTGAGCTGGGGATCTGTACAGACCCAGGAGCCATTAAGCATCTT  | 48955 |
| bosTau6_CR_re | 2301  | GCCTTCTTTCCGGATGAACAGAGAGAGGCGCCTGATGCTAGTCACATGGC  | 2350  |

Additional\_File2\_BAAlignment.txt

|               |       |                                                     |       |
|---------------|-------|-----------------------------------------------------|-------|
| CH240-104M22  | 48956 | GCCTTCTTTCCGGATGAACAGAGAGAGGCGCCTGATGCTAGTCACATGGC  | 49005 |
| bosTau6_CR_re | 2351  | AACTCACACTCATCTCTGGCACGTTTCTCTCTTCGTTCTGACGTTCTCT   | 2400  |
| CH240-104M22  | 49006 | AACTCACACTCATCTCTGGCACGTTTCTCTCTTCGTTCTGACGTTCTCT   | 49055 |
| bosTau6_CR_re | 2401  | TATCTTTTGGGTCATAAAGAGATTTTCATATGATGTACATTTTCTTTGAG  | 2450  |
| CH240-104M22  | 49056 | TATCTTTTGGGTCATAAAGAGATTTTCATATGATGTACATTTTCTTTGAG  | 49105 |
| bosTau6_CR_re | 2451  | TCTTTCTCCTTTGTTTCAGAGGAGCTGTCTCCCCCTCTCTTCTCCATAGG  | 2500  |
| CH240-104M22  | 49106 | TCTTTCTCCTTTGTTTCAGAGGAGCTGTCTCCCCCTCTCTTCTCCATAGG  | 49155 |
| bosTau6_CR_re | 2501  | GAAGGGAGCCCCGAGCTCTGGACTTTTGAAGGACATCCTATCATATTA    | 2550  |
| CH240-104M22  | 49156 | GAAGGGAGCCCCGAGCTCTGGACTTTTGAAGGACATCCTATCATATTA    | 49205 |
| bosTau6_CR_re | 2551  | GAGCATGCACACACAACCTTTGATCCTTTCTCTGACACATGGTGCATT    | 2600  |
| CH240-104M22  | 49206 | GAGCATGCACACACAACCTTTGATCCTTTCTCTGACACATGGTGCATT    | 49255 |
| bosTau6_CR_re | 2601  | GATCATCCTTCACAGACTTGCATTGTCTGTGGCTTACATCATGAAGCGTG  | 2650  |
| CH240-104M22  | 49256 | GATCATCCTTCACAGACTTGCATTGTCTGTGGCTTACATCATGAAGCGTG  | 49305 |
| bosTau6_CR_re | 2651  | GTCCTGTGAAGAGACTGGATCTGAAGAACACATGAGACAGAGAATGCGTA  | 2700  |
| CH240-104M22  | 49306 | GTCCTGTGAAGAGACTGGATCTGAAGAACACATGAGACAGAGAATGCGTA  | 49355 |
| bosTau6_CR_re | 2701  | TTGTCAGATTGATTTAACTTAGAGGAATCAGCAGGAAATTGTTGGCATC   | 2750  |
| CH240-104M22  | 49356 | TTGTCAGATTGATTTAACTTAGAGGAATCAGCAGGAAATTGTTGGCATC   | 49405 |
| bosTau6_CR_re | 2751  | ATGAATCATGGGTGAAAGATCTTTGCATCACAGGCAAAATGCTTCATTCC  | 2800  |
| CH240-104M22  | 49406 | ATGAATCATGGGTGAAAGATCTTTGCATCACAGGCAAAATGCTTCATTCC  | 49455 |
| bosTau6_CR_re | 2801  | AGACTCTGACGGTCTTACCCTGATGGCTCCTTCCAGTAAGGACTGCCCT   | 2850  |
| CH240-104M22  | 49456 | AGACTCTGACGGTCTTACCCTGATGGCTCCTTCCAGTAAGGACTGCCCT   | 49505 |
| bosTau6_CR_re | 2851  | TGGAAAGCATCACGAAAAATGAAAGGGTACTTTCCAATTCTTTTATTTT   | 2900  |
| CH240-104M22  | 49506 | TGGAAAGCATCACGAAAAATGAAAGGGTACTTTCCAATTCTTTTATTTT   | 49555 |
| bosTau6_CR_re | 2901  | TTCAAGTTTATTTTTAGAGCAGTTTTAGGTTACAATAAAATAGAGAGGA   | 2950  |
| CH240-104M22  | 49556 | TTCAAGTTTATTTTTAGAGCAGTTTTAGGTTACAATAAAATAGAGAGGA   | 49605 |
| bosTau6_CR_re | 2951  | AGAGAATTTCCACGTACATTTTGCCCCCACCCTAAGCACAGCCTCTCCC   | 3000  |
| CH240-104M22  | 49606 | AGAGAATTTCCACGTACATTTTGCCCCCACCCTAAGCACAGCCTCTCCC   | 49655 |
| bosTau6_CR_re | 3001  | CAATCCACAGCCCCACCGGAGGGTGGTGCATGTGTTACAGCTGATGGAC   | 3050  |
| CH240-104M22  | 49656 | CAATCCACAGCCCCACCGGAGGGTGGTGCATGTGTTACAGCTGATGGAC   | 49705 |
| bosTau6_CR_re | 3051  | CCATGCTTTGTGTGGTTGTTTCAGTCACTCAGTCATGTCCGACTCTTTGCG | 3100  |
| CH240-104M22  | 49706 | CCATGCTTTGTGTGGTTGTTTCAGTCACTCAGTCATGTCCGACTCTTTGCG | 49755 |
| bosTau6_CR_re | 3101  | ACCCCATGAATGGCAGCACGCCAGGCCTCCCTGTCCATCACCAGCTCCCA  | 3150  |
| CH240-104M22  | 49756 | ACCCCATGAATGGCAGCACGCCAGGCCTCCCTGTCCATCACCAGCTCCCA  | 49805 |
| bosTau6_CR_re | 3151  | GAGTTCACTCAGACTCACGTCCATCGAGTCAGTGATGCCATCCAGCCATC  | 3200  |

Additional\_File2\_BAAlignment.txt

|               |       |                                                     |                                              |       |
|---------------|-------|-----------------------------------------------------|----------------------------------------------|-------|
| CH240-104M22  | 49806 | GAGTTC                                              | ACTCAGACTCACGTCCATCGAGTCAGTGATGCCATCCAGCCATC | 49855 |
| bosTau6_CR_re | 3201  | TCATCCTCTGT                                         | CACCCCTTTTCTCTGTCCCCCAATCCCTCCCAGCAT         | 3250  |
| CH240-104M22  | 49856 | TCATCCTCTGT                                         | CACCCCTTTTCTCTGTCCCCCAATCCCTCCCAGCAT         | 49905 |
| bosTau6_CR_re | 3251  | CAGTCTTTTCCAGT                                      | GAGTCAGCTCTTACATCAGGTGGCCAAAGGATTGG          | 3300  |
| CH240-104M22  | 49906 | CAGTCTTTTCCAGT                                      | GAGTCAGCTCTTACATCAGGTGGCCAAAGGATTGG          | 49955 |
| bosTau6_CR_re | 3301  | AGCTTCAGCTT                                         | CAGCATCAGTCCTTCCAATGAATATTCAGGACTGATTTTC     | 3350  |
| CH240-104M22  | 49956 | AGCTTCAGCTT                                         | CAGCATCAGTCCTTCCAATGAATATTCAGGACTGATTTTC     | 50005 |
| bosTau6_CR_re | 3351  | CATTAGGATTGACT                                      | GGTTTGGATCTTCTTGCCATTGAAGGGACTCTCAAGA        | 3400  |
| CH240-104M22  | 50006 | CATTAGGATTGACT                                      | GGTTTGGATCTTCTTGCCATTGAAGGGACTCTCAAGA        | 50055 |
| bosTau6_CR_re | 3401  | GTCTTCTCCAACACCACAGTT                               | CAAAAGCATCAATTCTTCACTACTCAGCC                | 3450  |
| CH240-104M22  | 50056 | GTCTTCTCCAACACCACAGTT                               | CAAAAGCATCAATTCTTCACTACTCAGCC                | 50105 |
| bosTau6_CR_re | 3451  | TTGTTTATGGTTCAACTCTCACATCCATACACGACTATTGGAAAAACCAT  |                                              | 3500  |
| CH240-104M22  | 50106 | TTGTTTATGGTTCAACTCTCACATCCATACACGACTATTGGAAAAACCAT  |                                              | 50155 |
| bosTau6_CR_re | 3501  | AGCTTTGGCTATACAGCTTCCCTGGTAGCTCAGTTGGTAAAAGAACCTGC  |                                              | 3550  |
| CH240-104M22  | 50156 | AGCTTTGGCTATACAGCTTCCCTGGTAGCTCAGTTGGTAAAAGAACCTGC  |                                              | 50205 |
| bosTau6_CR_re | 3551  | CTGCAGTGCAGGAGACCTGGGTTTGGATCCCTGGGTGCGGAAGATGCCCTG |                                              | 3600  |
| CH240-104M22  | 50206 | CTGCAGTGCAGGAGACCTGGGTTTGGATCCCTGGGTGCGGAAGATGCCCTG |                                              | 50255 |
| bosTau6_CR_re | 3601  | GAGGAGGAAATGGCAACCCACTCCAGTATTCTTGCCTGGAGAACCCCATG  |                                              | 3650  |
| CH240-104M22  | 50256 | GAGGAGGAAATGGCAACCCACTCCAGTATTCTTGCCTGGAGAACCCCATG  |                                              | 50305 |
| bosTau6_CR_re | 3651  | GACAGAGGAGCCTGGTGAGTTACAGTCCATCTAGAGGCGAGAGTCAGATG  |                                              | 3700  |
| CH240-104M22  | 50306 | GACAGAGGAGCCTGGTGAGTTACAGTCCATCTAGAGGCGAGAGTCAGATG  |                                              | 50355 |
| bosTau6_CR_re | 3701  | CGACTGAGTGACTGACCCACCAATGACTATACAGACCTTTGTCAGCAAAG  |                                              | 3750  |
| CH240-104M22  | 50356 | CGACTGAGTGACTGACCCACCAATGACTATACAGACCTTTGTCAGCAAAG  |                                              | 50405 |
| bosTau6_CR_re | 3751  | TGATGTCCCTGCTTTTGAATATGCTGTCTACGTTTGTATAGCTTTCTGT   |                                              | 3800  |
| CH240-104M22  | 50406 | TGATGTCCCTGCTTTTGAATATGCTGTCTACGTTTGTATAGCTTTCTGT   |                                              | 50455 |
| bosTau6_CR_re | 3801  | CTAAGGAGCAAGCGTCTCTTAATTTTATGGCTGCAGACACCATCTTCAGT  |                                              | 3850  |
| CH240-104M22  | 50456 | CTAAGGAGCAAGCGTCTCTTAATTTTATGGCTGCAGACACCATCTTCAGT  |                                              | 50505 |
| bosTau6_CR_re | 3851  | GGACTTATGCTGGTACATCGCAATTACCCAAGGTCCATACTTTATATAAG  |                                              | 3900  |
| CH240-104M22  | 50506 | GGACTTATGCTGGTACATCGCAATTACCCAAGGTCCATACTTTATATAAG  |                                              | 50555 |
| bosTau6_CR_re | 3901  | GCTCACTTTTGGTGTGCGTATTCTGTGTGTTTGGACAAGTATCATCATT   |                                              | 3950  |
| CH240-104M22  | 50556 | GCTCACTTTTGGTGTGCGTATTCTGTGTGTTTGGACAAGTATCATCATT   |                                              | 50605 |
| bosTau6_CR_re | 3951  | ATATACATGATATCATACAAAGCATTTCCTGACCCTAAAGATTATCTGT   |                                              | 4000  |
| CH240-104M22  | 50606 | ATATACATGATATCATACAAAGCATTTCCTGACCCTAAAGATTATCTGT   |                                              | 50655 |
| bosTau6_CR_re | 4001  | GTTCCCTCCATTATGCCTCCTTGACCCACTGGCAGCTGCTGGTCTTTA    |                                              | 4050  |

Additional\_File2\_BAAlignment.txt

|               |       |                                                      |       |
|---------------|-------|------------------------------------------------------|-------|
| CH240-104M22  | 50656 | G TTCCTCCCATTTCATGCCTCCTTGACCCACTGGCAGCTGCTGGTCCTTTA | 50705 |
| bosTau6_CR_re | 4051  | ATCATCTCCACAGTTTTGCTTTTTCCAGAACAACATAAAGTTGGAATCCT   | 4100  |
| CH240-104M22  | 50706 | ATCATCTCCACAGTTTTGCTTTTTCCAGAACAACATAAAGTTGGAATCCT   | 50755 |
| bosTau6_CR_re | 4101  | ACAGTGCGTAGTTTTCTCAGATTAACCTCCTCTGTTTAGTAATAAGCATT   | 4150  |
| CH240-104M22  | 50756 | ACAGTGCGTAGTTTTCTCAGATTAACCTCCTCTGTTTAGTAATAAGCATT   | 50805 |
| bosTau6_CR_re | 4151  | TAAGTTTCCTCGATGTCACCTCGTTGTTTGAAGGCTCATTTCTTTTTAGA   | 4200  |
| CH240-104M22  | 50806 | TAAGTTTCCTCGATGTCACCTCGTTGTTTGAAGGCTCATTTCTTTTTAGA   | 50855 |
| bosTau6_CR_re | 4201  | ACTGAATAATATTTTCATTGTCTGGATGTACCCTCGTGATTTATCCATTC   | 4250  |
| CH240-104M22  | 50856 | ACTGAATAATATTTTCATTGTCTGGATGTACCCTCGTGATTTATCCATTC   | 50905 |
| bosTau6_CR_re | 4251  | ACCTACTAAGGGACATTTTGACAATTATGAATAAAGCTGCTATACATATC   | 4300  |
| CH240-104M22  | 50906 | ACCTACTAAGGGACATTTTGACAATTATGAATAAAGCTGCTATACATATC   | 50955 |
| bosTau6_CR_re | 4301  | TGTGCTAATTTTCATCTGAACGTGAGTTTTCAACTCTGAGTAAATATCAA   | 4350  |
| CH240-104M22  | 50956 | TGTGCTAATTTTCATCTGAACGTGAGTTTTCAACTCTGAGTAAATATCAA   | 51005 |
| bosTau6_CR_re | 4351  | GGCGAATGTTGGCTGAATCCTATGGCTAGAGTATGCTTAGGTTTGTAAGA   | 4400  |
| CH240-104M22  | 51006 | GGCGAATGTTGGCTGAATCCTATGGCTAGAGTATGCTTAGGTTTGTAAGA   | 51055 |
| bosTau6_CR_re | 4401  | AAATAAACTGTCTTCAAGGTGGCTGTATCACTCTGCATTCCCACCAGCAG   | 4450  |
| CH240-104M22  | 51056 | AAATAAACTGTCTTCAAGGTGGCTGTATCACTCTGCATTCCCACCAGCAG   | 51105 |
| bosTau6_CR_re | 4451  | TAAATCAGAGTTCTTGCTGTTGCGTATTCTCGGCCACATTTGCTGTTGCC   | 4500  |
| CH240-104M22  | 51106 | TAAATCAGAGTTCTTGCTGTTGCGTATTCTCGGCCACATTTGCTGTTGCC   | 51155 |
| bosTau6_CR_re | 4501  | AGGGTTCAGATTTTGCCTTTCTGATTGCTATGTGGTAGTATCTCGTTGTT   | 4550  |
| CH240-104M22  | 51156 | AGGGTTCAGATTTTGCCTTTCTGATTGCTATGTGGTAGTATCTCGTTGTT   | 51205 |
| bosTau6_CR_re | 4551  | TGCATTTACCTGGTGGCCTATGATGGGGGTATCTCTACTTACTTGTGCATC  | 4600  |
| CH240-104M22  | 51206 | TGCATTTACCTGGTGGCCTATGATGGGGGTATCTCTACTTACTTGTGCATC  | 51255 |
| bosTau6_CR_re | 4601  | AGCACATCTTTAGTGAGGTGTCTGTTAACATCTTAGTCCATTTTTTAATT   | 4650  |
| CH240-104M22  | 51256 | AGCACATCTTTAGTGAGGTGTCTGTTAACATCTTAGTCCATTTTTTAATT   | 51305 |
| bosTau6_CR_re | 4651  | AGGCTGACTGCGTTTTTGTGCTGCATTTAAGAGTTCTTTGTACATTTT     | 4700  |
| CH240-104M22  | 51306 | AGGCTGACTGCGTTTTTGTGCTGCATTTAAGAGTTCTTTGTACATTTT     | 51355 |
| bosTau6_CR_re | 4701  | GGAAAACAATCCTGTATGTTTCTTTTGCAAGTATTTTCTCTTGTCCACG    | 4750  |
| CH240-104M22  | 51356 | GGAAAACAATCCTGTATGTTTCTTTTGCAAGTATTTTCTCTTGTCCACG    | 51405 |
| bosTau6_CR_re | 4751  | GTTTGTCTTCTCATTCTTTAACGTTGTCCTTGAGTTCCCCTGGTGGCTC    | 4800  |
| CH240-104M22  | 51406 | GTTTGTCTTCTCATTCTTTAACGTTGTCCTTGAGTTCCCCTGGTGGCTC    | 51455 |
| bosTau6_CR_re | 4801  | AGCCGGCAGAGAATCCGCCTGCAATGCAGCAAACCCAGCTTCAATCCCTG   | 4850  |
| CH240-104M22  | 51456 | AGCCGGCAGAGAATCCGCCTGCAATGCAGCAAACCCAGCTTCAATCCCTG   | 51505 |
| bosTau6_CR_re | 4851  | CATTGAAGGTCTCCTGGAGAAGGGAATGGCAGCCCACTCCAGTATTCTTG   | 4900  |

Additional\_File2\_BAAlignment.txt

|               |       |                                                      |       |
|---------------|-------|------------------------------------------------------|-------|
| CH240-104M22  | 51506 | CATTGAAGGTCTCCTGGAGAAGGGAATGGCAGCCCACTCCAGTATTCTTG   | 51555 |
| bosTau6_CR_re | 4901  | CCTGGAGAACCCCATAGACCGAAGAGCCTGGTGGGTTACAGTCCATGGGG   | 4950  |
| CH240-104M22  | 51556 | CCTGGAGAACCCCATAGACCGAAGAGCCTGGTGGGTTACAGTCCATGGGG   | 51605 |
| bosTau6_CR_re | 4951  | TCACAAAGAGTCAGACACAACCAAGTACTAACACACTTGCAGGGCTGAA    | 5000  |
| CH240-104M22  | 51606 | TCACAAAGAGTCAGACACAACCAAGTACTAACACACTTGCAGGGCTGAA    | 51655 |
| bosTau6_CR_re | 5001  | GTTTTTAATTTAATGAAGTCCAGCGTGTCAATTCTTTCTTTCATGAATG    | 5050  |
| CH240-104M22  | 51656 | GTTTTTAATTTAATGAAGTCCAGCGTGTCAATTCTTTCTTTCATGAATG    | 51705 |
| bosTau6_CR_re | 5051  | GTGCTTTTAGTATCGTACCTAAAAAGTCATCACCGTACCTAAGGTCATCT   | 5100  |
| CH240-104M22  | 51706 | GTGCTTTTAGTATCGTACCTAAAAAGTCATCACCGTACCTAAGGTCATCT   | 51755 |
| bosTau6_CR_re | 5101  | AAGTTTTCTCTTATTTTGTCTCCTGGGAGTTTCAAAGTTTTCCATTTTAT   | 5150  |
| CH240-104M22  | 51756 | AAGTTTTCTCTTATTTTGTCTCCTGGGAGTTTCAAAGTTTTCCATTTTAT   | 51805 |
| bosTau6_CR_re | 5151  | GTTTAGGTCTACAATCCATTCCGAGTTGGTTTTTGTGAAGGGTGTAAAGT   | 5200  |
| CH240-104M22  | 51806 | GTTTAGGTCTACAATCCATTCCGAGTTGGTTTTTGTGAAGGGTGTAAAGT   | 51855 |
| bosTau6_CR_re | 5201  | CTGCGCCTCACGCAGACCTTAGATTCAGTTTTTTGTGGATGTCCGATTGG   | 5250  |
| CH240-104M22  | 51856 | CTGCGCCTCACGCAGACCTTAGATTCAGTTTTTTGTGGATGTCCGATTGG   | 51905 |
| bosTau6_CR_re | 5251  | TCCAGCGCCGTTTGTGACAAGATCATCTTTGCTCCATCCTGTTGCCTCT    | 5300  |
| CH240-104M22  | 51906 | TCCAGCGCCGTTTGTGACAAGATCATCTTTGCTCCATCCTGTTGCCTCT    | 51955 |
| bosTau6_CR_re | 5301  | ACCCCTTGATTGAAGATCAATGACAATATTTGTGGAGCCTATCTGTGTTC   | 5350  |
| CH240-104M22  | 51956 | ACCCCTTGATTGAAGATCAATGACAATATTTGTGGAGCCTATCTGTGTTC   | 52005 |
| bosTau6_CR_re | 5351  | TGTATTCCATTCCATTGATCTATTTGTCTTTTCGTTACCAATTAGACAC    | 5400  |
| CH240-104M22  | 52006 | TGTATTCCATTCCATTGATCTATTTGTCTTTTCGTTACCAATTAGACAC    | 52055 |
| bosTau6_CR_re | 5401  | TGTCTTGATTTCGTAGGACTTACGATTTTCATGGTTCTGAAAATCTTCCATT | 5450  |
| CH240-104M22  | 52056 | TGTCTTGATTTCGTAGGACTTACGATTTTCATGGTTCTGAAAATCTTCCATT | 52105 |
| bosTau6_CR_re | 5451  | AAGTCTTGAAATTTAGTAATGTTAGCCCTCTGACATAGTCCTTCTTCTGT   | 5500  |
| CH240-104M22  | 52106 | AAGTCTTGAAATTTAGTAATGTTAGCGCTCTGACTTAGTCCTTCTTCTGT   | 52155 |
| bosTau6_CR_re | 5501  | ATTGTAAGTACTACTCTGGATTTTTTTGTCTCTATGTATAAGAGGAACATA  | 5550  |
| CH240-104M22  | 52156 | ATTGTAAGTACTACTCTGGATTTTTTTGTCTCTATGTATAAGAGGAACATA  | 52205 |
| bosTau6_CR_re | 5551  | AAAGCCTCTTGATGAAAGTAAAGAGAAGAGTAAAAAAGTTGGCTTAAAG    | 5600  |
| CH240-104M22  | 52206 | AAAGCCTCTTGATGAAAGTAAAGAGAAGAGTAAAAAAGTTGGCTTAAAG    | 52255 |
| bosTau6_CR_re | 5601  | CTCAACATTCAGAAAACAAATATCATGGCATCTGGTCCCATCACTTCATG   | 5650  |
| CH240-104M22  | 52256 | CTCAACATTCAGAAAACAAATATCATGGCATCTGGTCCCATCACTTCATG   | 52305 |
| bosTau6_CR_re | 5651  | GGAAATAGATGGGGAAACAGTGGAAACAGTAAAGACTTTATTTTCTTGG    | 5700  |
| CH240-104M22  | 52306 | GGAAATAGATGGGGAAACAGTGGAAACAGTAAAGACTTTATTTTCTTGG    | 52355 |
| bosTau6_CR_re | 5701  | GCTCCAAAATCACTGCAGATGGTACTGCAGCCATGAAATTAAGAGACGC    | 5750  |

Additional\_File2\_BAAlignment.txt

|               |       |                                                     |       |
|---------------|-------|-----------------------------------------------------|-------|
| CH240-104M22  | 52356 | GCTCCAAAATCACTGCAGATGGTGACTGCAGCCATGAAATTTAAAAGACGC | 52405 |
| bosTau6_CR_re | 5751  | TTACTCCTTGGAAGGAAAGTTATGACCAACCTAGATAGCATATTGAAAAG  | 5800  |
| CH240-104M22  | 52406 | TTACTCCTTGGAAGGAAAGTTATGACCAACCTAGATAGCATATTGAAAAG  | 52455 |
| bosTau6_CR_re | 5801  | CAGAGACATTACTTTGCCAACAAAGGTCCATCTAGTCAAAGCTATGGTTT  | 5850  |
| CH240-104M22  | 52456 | CAGAGACATTACTTTGCCAACAAAGGTCCATCTAGTCAAAGCTATGGTTT  | 52505 |
| bosTau6_CR_re | 5851  | TTCCTGTGGTCATATATGGATGTGAGAGTTGGACTGTGAAGAAGGCTGAG  | 5900  |
| CH240-104M22  | 52506 | TTCCTGTGGTCATATATGGATGTGAGAGTTGGACTGTGAAGAAGGCTGAG  | 52555 |
| bosTau6_CR_re | 5901  | CACCGAAGAATTGATGCTTTTTGAACTGTGGTGTGGAGAAGACTCTTGAG  | 5950  |
| CH240-104M22  | 52556 | CACCGAAGAATTGATGCTTTTTGAACTGTGGTGTGGAGAAGACTCTTGAG  | 52605 |
| bosTau6_CR_re | 5951  | AGTCCCTTGGACTGCAAGGAGATCCAACCAGTCCATTCTGAAGGAGATCA  | 6000  |
| CH240-104M22  | 52606 | AGTCCCTTGGACTGCAAGGAGATCCAACCAGTCCATTCTGAAGGAGATCA  | 52655 |
| bosTau6_CR_re | 6001  | G 6001                                              |       |
| CH240-104M22  | 52656 | G 52656                                             |       |
