# Supplementary material for: Remapping of the belted phenotype in cattle on BTA3 identifies a multiplication event as the candidate causal mutation
Source: PubMed Central journal article supplement (PMC6035435; doi:10.1186/s12711-018-0407-9), 2018-07-06

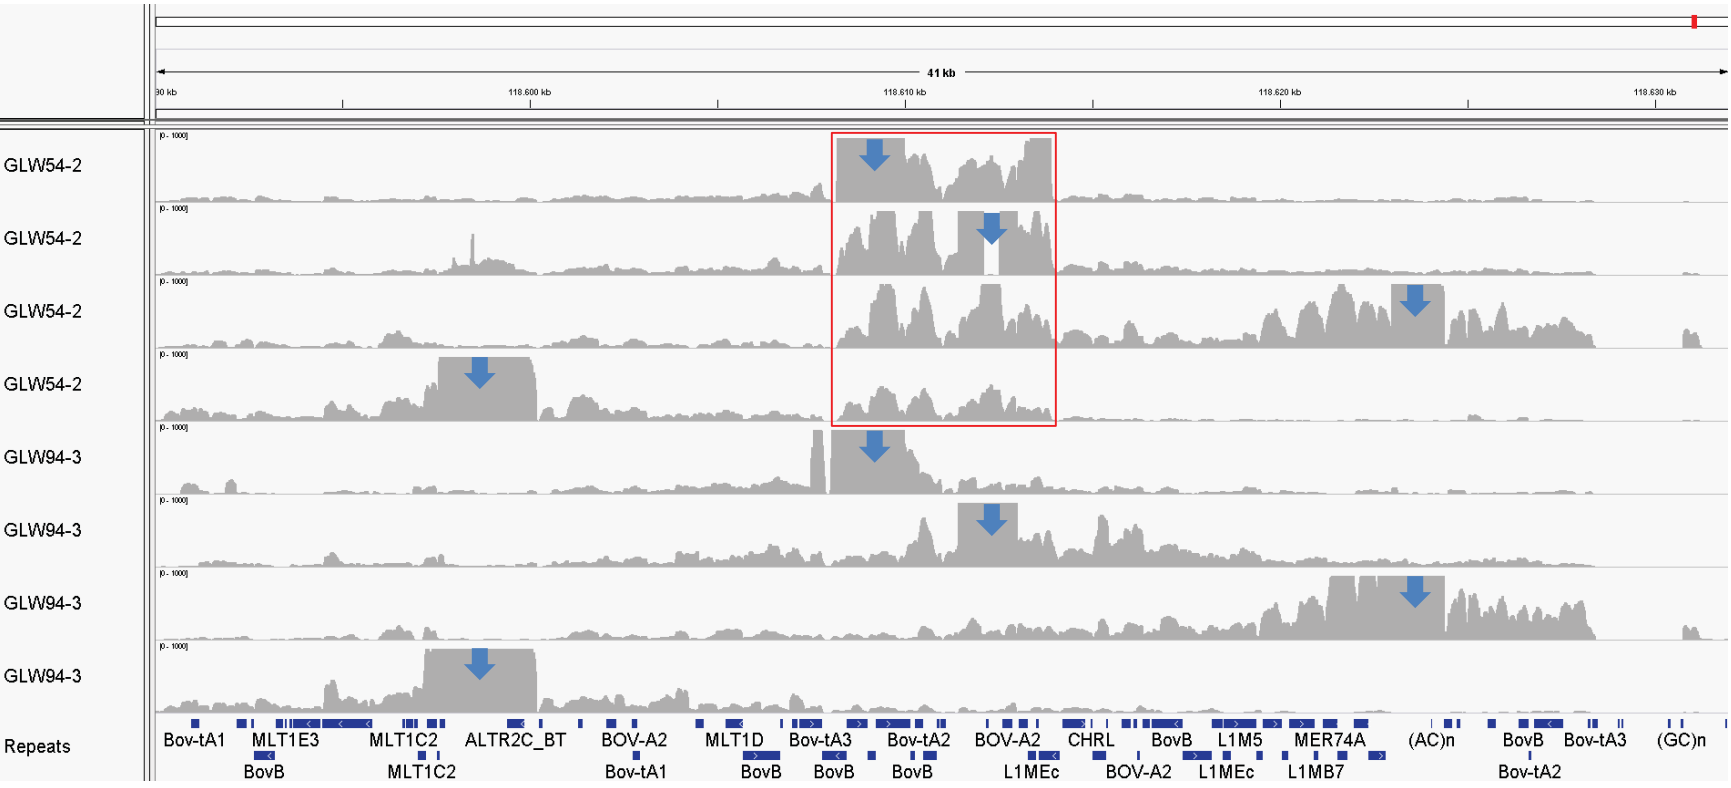

Supplement: 12711_2018_407_MOESM3_ESM.pdf [file 12711_2018_407_MOESM3_ESM.pdf]
