# Supplementary material for: Remapping of the belted phenotype in cattle on BTA3 identifies a multiplication event as the candidate causal mutation
Source: PubMed Central journal article supplement (PMC6035435; doi:10.1186/s12711-018-0407-9), 2018-07-06
Supplement: 12711_2018_407_MOESM5_ESM.pdf [file 12711_2018_407_MOESM5_ESM.pdf]

a)

chr3:118,599,960-118,622,766

Go

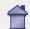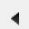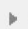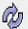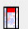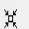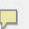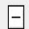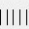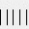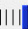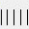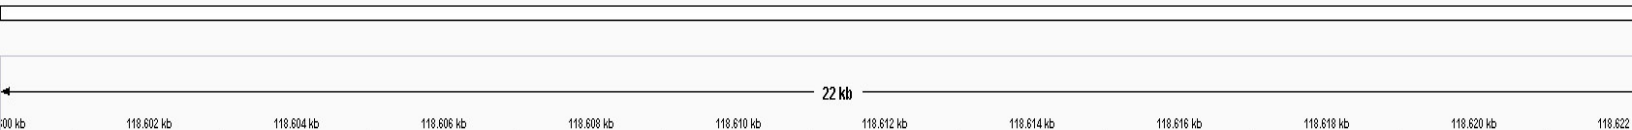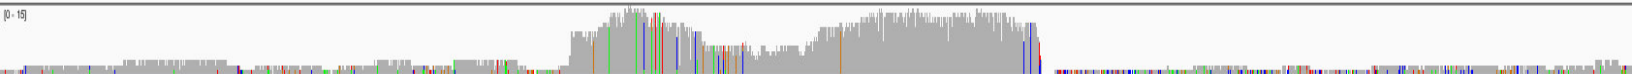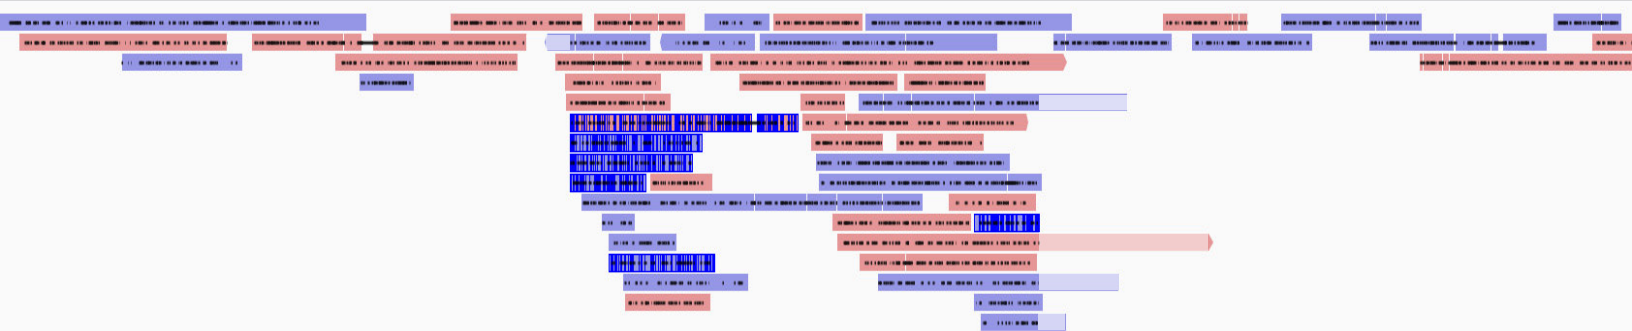

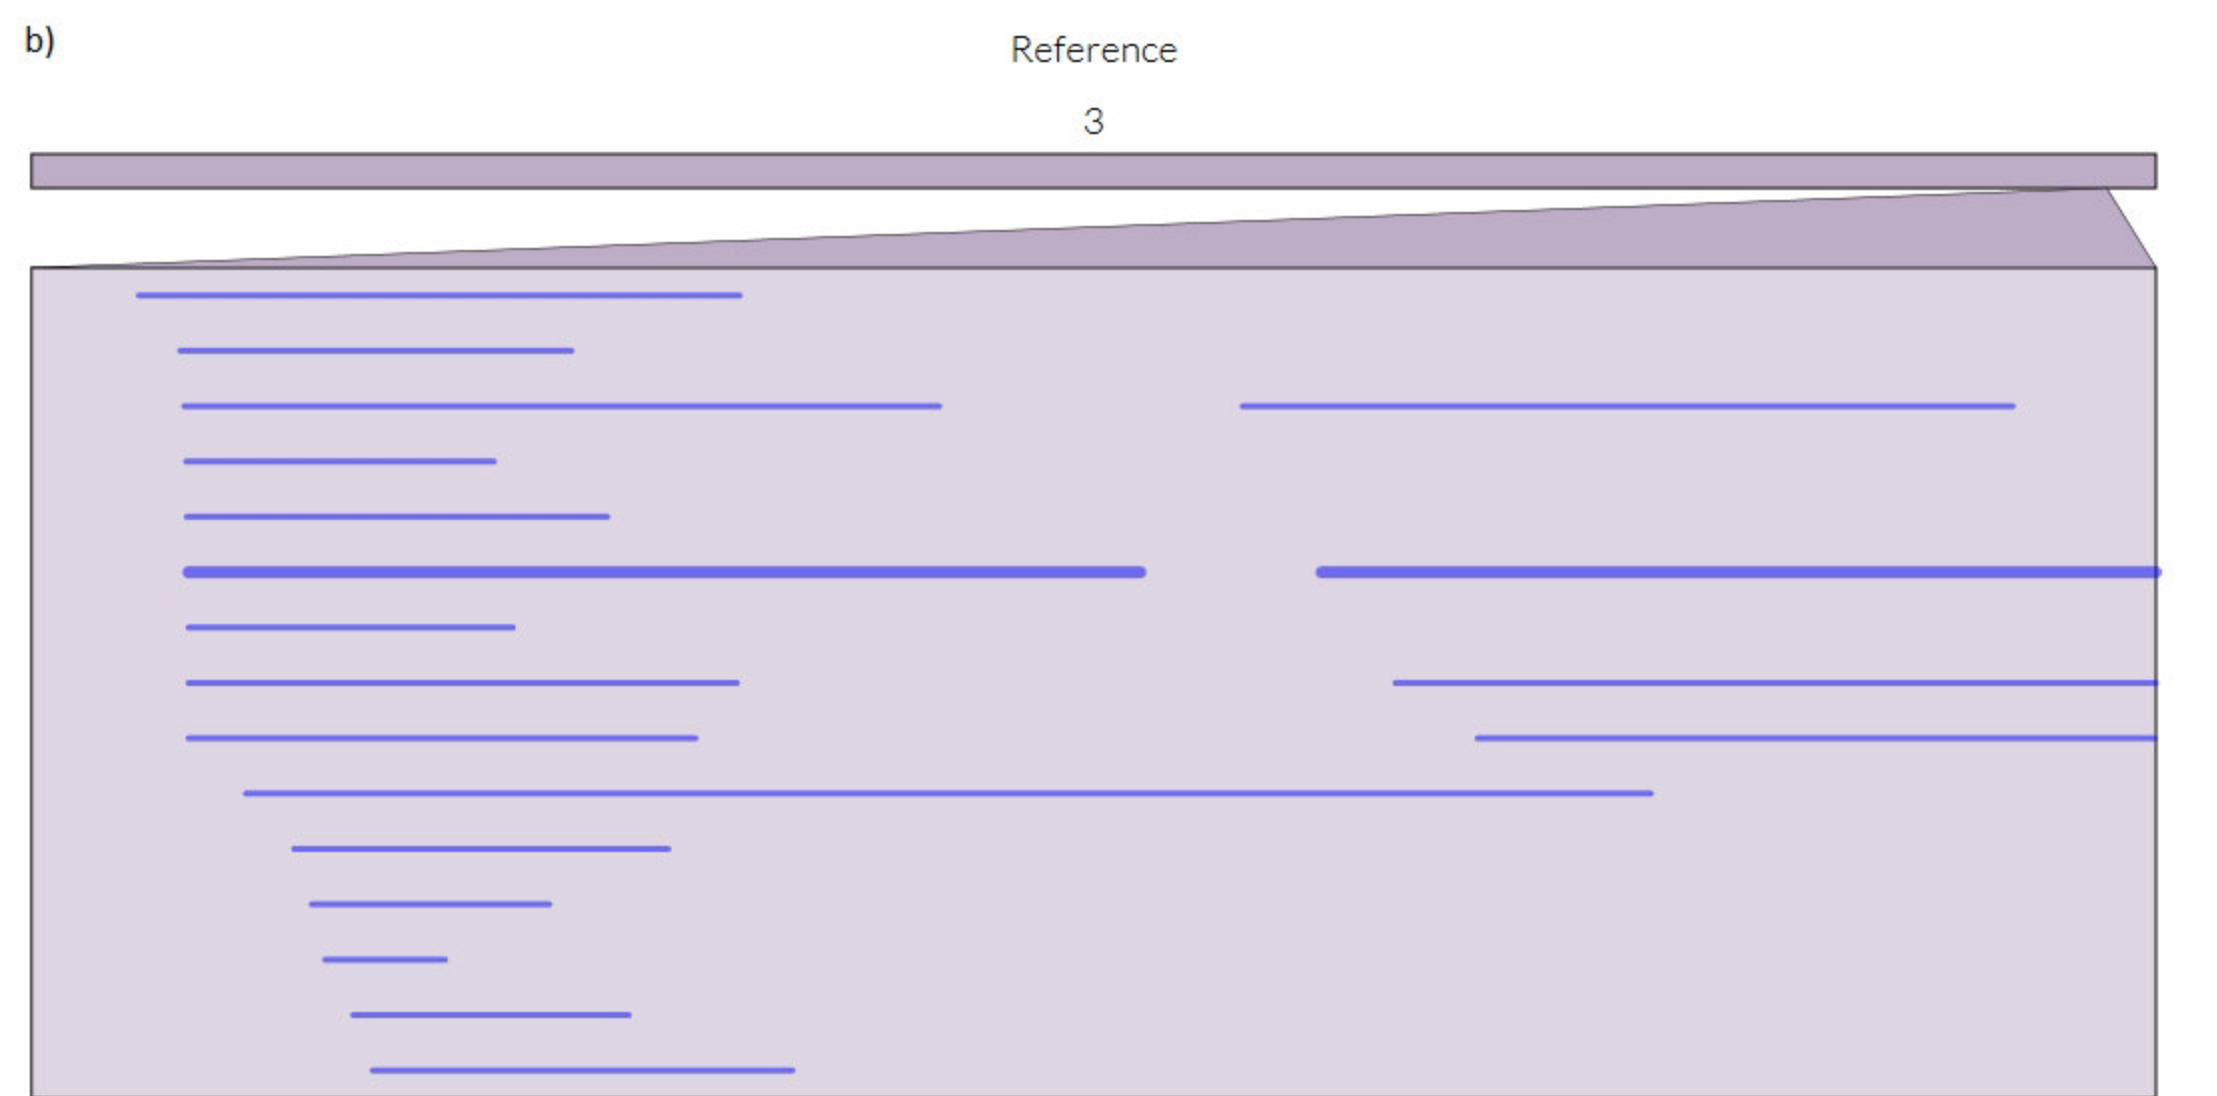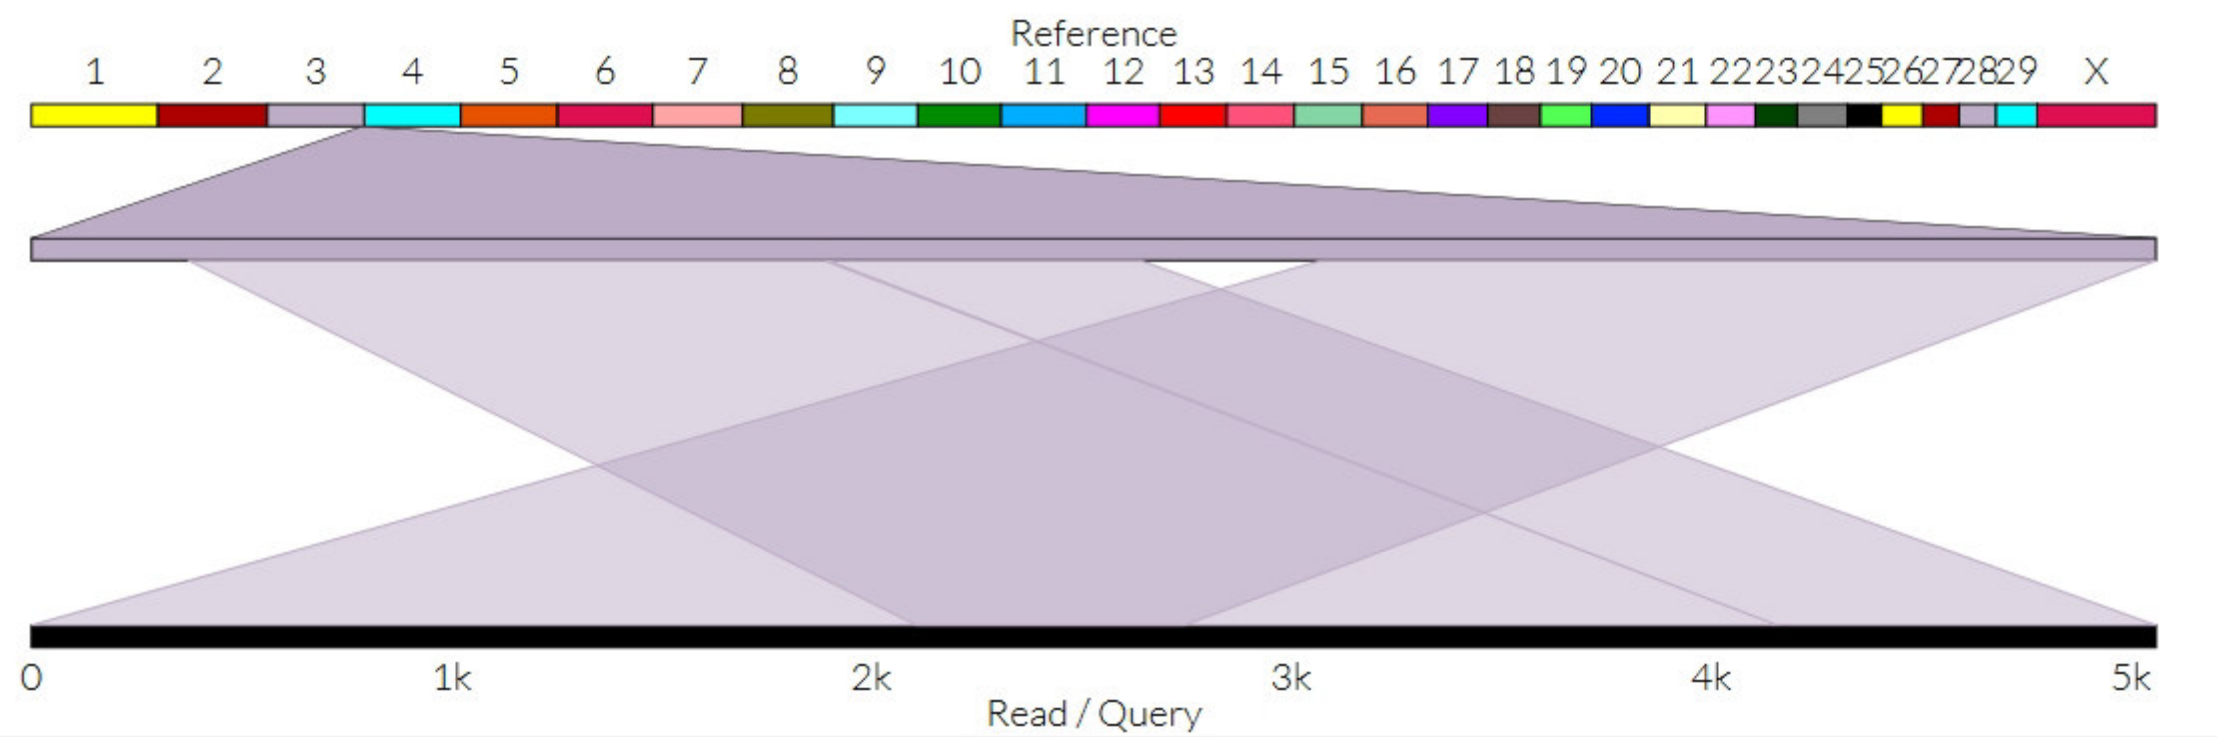

c)

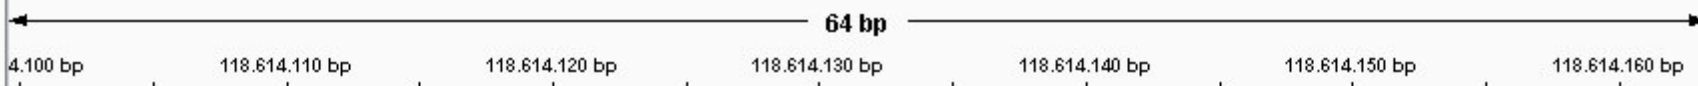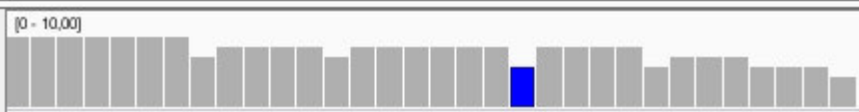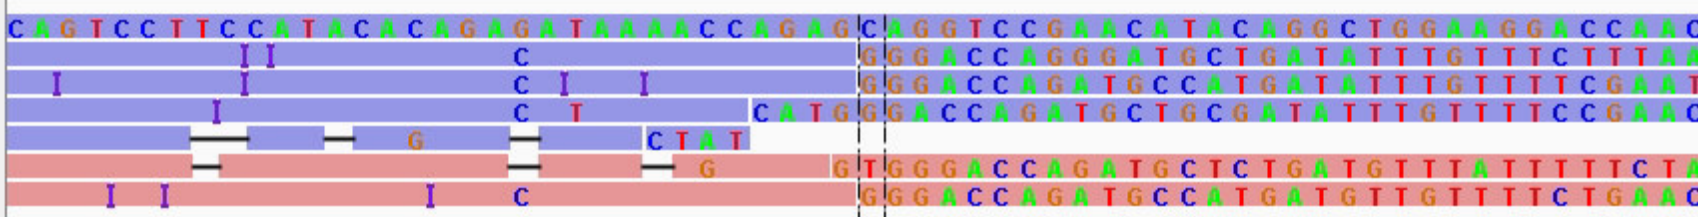

A C

a c t g t t t c c c c a t c t a t t t g c c a t g a a g t g a t a c a a c a g g C A A A A A G A A A C A G T T A A T G A A A G T
